# Supplementary material
Source: PubMed Central journal article supplement (PMC3207704)
Supplement: 1113395108_pnas.201113395SI.pdf [file 1113395108_pnas.201113395SI.pdf]

# Supporting Information

Scheid et al. 10.1073/pnas.1113395108

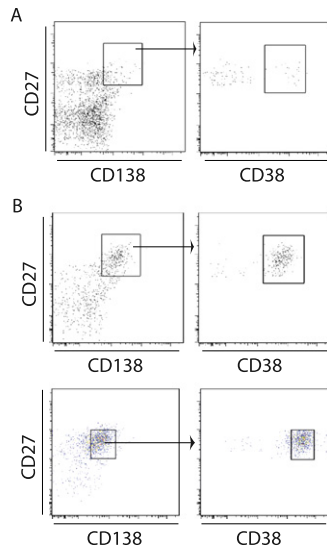

**Fig. S1.** Representative FACS profiles of sorted plasma cells from HDs: FACS plots of bone marrow mononuclear cells from HD16 before (A) and HD16 (B, Upper) and HD21 (B, Lower) after CD138-magnetic bead-mediated enrichment. Shown are representative sort gates for the isolation of CD138<sup>+</sup>CD27<sup>+</sup>CD38<sup>+</sup> single bone marrow plasma cells after magnetic bead-mediated enrichment of CD138<sup>+</sup> mononuclear bone marrow cells.

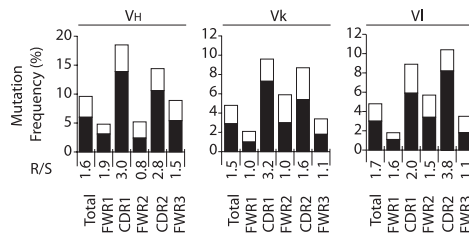

**Fig. S2.** IgG plasma cell antibodies show signs of antigen-mediated selection. Bar graphs summarize the frequency of nucleotide exchanges leading to replacement (R, solid bars) and silent (S, open bars) mutations in CDRs and framework regions of V<sub>H</sub>, V<sub>k</sub>, and V<sub>J</sub> genes from IgG-positive bone marrow plasma cells of four HDs. The R:S nucleotide exchange ratio is indicated below the graphs.

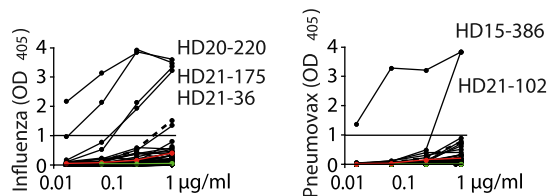

**Fig. S3.** Microbe-specific bone marrow plasma cells. IgG plasma cell antibodies and negative control antibody mGO53 (green line) (1) and low polyreactive antibody eiJB40 (red line) (1) from HDs were tested for reactivity with seasonal influenza vaccine and nonconjugated pneumococcal polysaccharide vaccine. Horizontal lines show cutoff OD<sub>405</sub> for positive reactivity. Clone names of nonpolyreactive, non-self-reactive vaccine-specific antibodies are indicated.

1. Wardemann H, et al. (2003) Predominant autoantibody production by early human B cell precursors. *Science* 301:1374–1377.
